# Supplementary material for: Establishing Polycistronic Expression in the Model Microorganism Ustilago maydis
Source: PubMed Central journal article supplement (PMC7326815; doi:10.3389/fmicb.2020.01384), 2020-06-24
Supplement: Data_Sheet_1.pdf [file Data_Sheet_1.pdf]

*Supplementary Material of the manuscript entitled*

**Establishing polycistronic expression  
in the model microorganism *Ustilago maydis***

**Kira Müntjes<sup>1</sup>, Magnus Philipp<sup>1</sup>, Lisa Hüsemann<sup>2</sup>, Nicole Heucken<sup>2</sup>, Stefanie Weidtkamp-Peters<sup>3</sup>, Kerstin Schipper<sup>1</sup>, Matias Zurbriggen<sup>2</sup> and Michael Feldbrügge<sup>1,\*</sup>**

Including Supplementary Figure S1-2 as well as Supplementary Table S1-S3

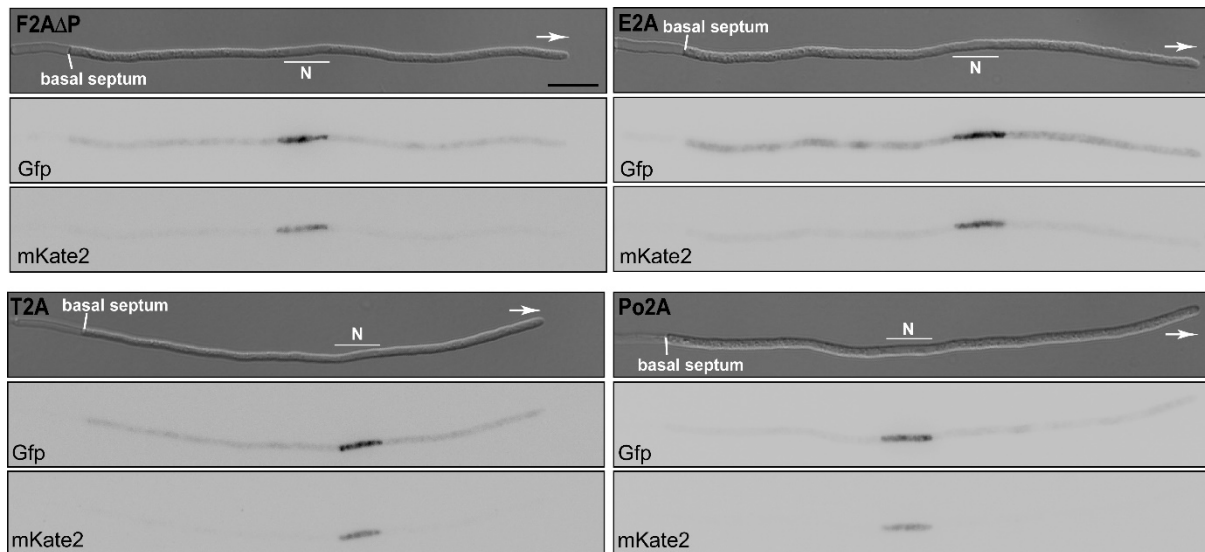

**Supplementary Figure S1. Separation efficiency of 2A peptides during hyphal growth *in vivo*.** Hyphal cells (6 h.p.i.) expressing reporter construct mKate2<sup>HA</sup>-L2-2A-Gfp<sup>NLS</sup> (inverted fluorescence micrographs; N, nucleus; scale bar 10  $\mu$ m; growth direction is indicated by arrow).

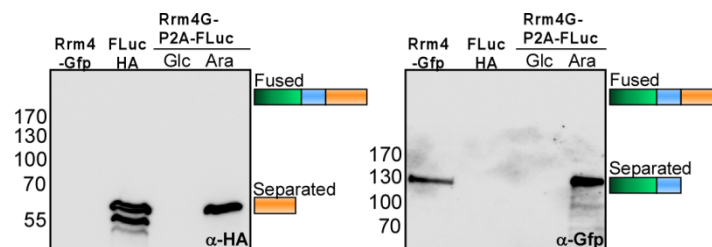

**Supplementary Figure S2. Studying regulated gene expression using peptide P2A**

Western blot analysis of AB33 derivatives under induced and uninduced conditions (Glc: Glucose; Ara: Arabinose; antibodies are given at the bottom, size of marker proteins in kDa at the left).

Supplementary Table S1: *U. maydis* strains used in this study; UMa, internal reference number

| Strain                                                                                  | Relevant genotype                                | Short description                                                                                                                                                                              | Uma  | Resistance cassette | Reference                             |
|-----------------------------------------------------------------------------------------|--------------------------------------------------|------------------------------------------------------------------------------------------------------------------------------------------------------------------------------------------------|------|---------------------|---------------------------------------|
| AB33                                                                                    | a2 <i>Pnar:bWebE1</i>                            | expression of active b heterodimer which is under the control of $P_{nar1}$ promoter; hyphal growth can be induced by switching the nitrogen source                                            | 133  |                     | (Brachmann, 2001)                     |
| AB33rrm4Δ                                                                               | <i>rrm4</i> Δ                                    | carries a deletion of <i>rrm4</i>                                                                                                                                                              | 273  | HygR                | (Becht et al., 2006)                  |
| AB33Rrm4-Gfp                                                                            | <i>rrm4-Gfp</i>                                  | expresses Rrm4 C-terminally fused to Gfp                                                                                                                                                       | 274  | NatR                | (Becht et al., 2006)                  |
| AB33Rrm4-mCherry                                                                        | <i>rrm4-mCherry</i>                              | expresses Rrm4 C-terminally fused to mCherry                                                                                                                                                   | 830  | HygR                | (Baumann et al., 2014)                |
| AB33Rrm4-TagRfp                                                                         | <i>rrm4-TagRfp</i>                               | expresses Rrm4 C-terminally fused to TagRfp                                                                                                                                                    | 1317 | NatR                | (Müntjes, 2015)                       |
| AB33Rrm4-mKate2                                                                         | <i>rrm4-mKate2</i>                               | expresses Rrm4 C-terminally fused to mKate2                                                                                                                                                    | 1985 | NatR                | This study                            |
| AB33upp3Δ                                                                               | <i>upp3</i> Δ                                    | carries a deletion of <i>upp3</i>                                                                                                                                                              | 2148 | HygR                | This study                            |
| AB33upp3Δ::P <sub>otef</sub> -mKate2-HA-GSG-F2A-Gfp-NLS                                 | <i>mKate2-GSG-F2A-Gfp-NLS</i>                    | co-expresses mKate2 fused to a HA tag and Gfp fused to an NLS partial separated during translation by F2A                                                                                      | 2495 | NatR                | This study                            |
| AB33upp3Δ::P <sub>otef</sub> -mKate2-HA-F2AΔP-Gfp-NLS                                   | <i>mKate2-F2AΔP-Gfp-NLS</i>                      | expresses a fusion protein of mKate2 fused to a HA tag and Gfp fused to an NLS; no separation during translation because of deletion of last proline of F2A                                    | 2520 | NatR                | This study                            |
| MB215 <i>rua1</i> Δ                                                                     | <i>rua1</i> Δ (CRISPR)                           | carries a deletion of <i>rua1</i>                                                                                                                                                              | 2598 | -                   | (Peter Stoffels, unpublished)         |
| AB33upp3Δ::P <sub>otef</sub> -Firefly-HA                                                | <i>firefly-HA</i>                                | expresses Firefly luciferase fused to an HA tag                                                                                                                                                | 2644 | NatR                | (L. Hüseemann et al., in preparation) |
| MB215 <i>rua1</i> Δ/P <sub>oma</sub> - <i>emt1-HA-L2-P2A-Gfp-mac1-L2-P2A-mac2-3xmyc</i> | <i>emt1-HA-L2-P2A-gfp-mac1-L2-P2A-mac2-3xmyc</i> | co-expresses Emt1 fused to an HA tag, Mac1 N-terminally fused to Gfp and Mac2 fused to a triple myc tag; all proteins are separation by P2A fused N-terminally to L2 linker during translation | 3084 | CbxR                | This study                            |
| AB33upp3Δ::P <sub>otef</sub> -mKate2-HA-L1-F2A-Gfp-NLS                                  | <i>mKate2-L1-F2A-Gfp-NLS</i>                     | co-expresses mKate2 fused to a HA tag and Gfp fused to an NLS; partial separated during translation by F2A fused N-terminally to L1 linker                                                     | 3116 | NatR                | This study                            |
| AB33upp3Δ::P <sub>otef</sub> -mKate2-HA-L2-F2AΔP-Gfp-NLS                                | <i>mKate2-L2-F2AΔP-Gfp-NLS</i>                   | expresses fusion of mKate2 fused to a HA tag and Gfp fused to an NLS; no separation during translation                                                                                         | 3119 | NatR                | This study                            |

Polycistronic expression in *U. maydis*

|                                                                           |                                   |                                                                                                                                                        |      |      |            |
|---------------------------------------------------------------------------|-----------------------------------|--------------------------------------------------------------------------------------------------------------------------------------------------------|------|------|------------|
|                                                                           |                                   | because of deletion of last proline of F2A                                                                                                             |      |      |            |
| <b>AB33<sup>supp3Δ</sup>::P<sub>otef</sub>-mKate2-HA-L2-T2A-Gfp-NLS</b>   | <i>mKate2-L2-T2A-Gfp-NLS</i>      | co-expresses mKate2 fused to a HA tag and Gfp fused to an NLS partial separated during translation by T2A fused N-terminally to L2                     | 3120 | NatR | This study |
| <b>AB33<sup>supp3Δ</sup>::P<sub>otef</sub>-mKate2-HA-L2-P2A-Gfp-NLS</b>   | <i>mKate2-L2-P2A-Gfp-NLS</i>      | co-expresses mKate2 fused to a HA tag and Gfp fused to an NLS separated during translation by P2A fused N-terminally to L2 linker                      | 3123 | NatR | This study |
| <b>AB33<sup>supp3Δ</sup>::P<sub>otef</sub>-mKate2-HA-L2-F2A-eGFP-NLS</b>  | <i>mKate2-L2-F2A-Gfp-NLS</i>      | co-expresses mKate2 fused to a HA tag and Gfp fused to an NLS partial separated during translation by F2A fused to L2 linker                           | 3144 | NatR | This study |
| <b>AB33<sup>supp3Δ</sup>::P<sub>otef</sub>-mKate2-HA-L2-Po2A-eGFP-NLS</b> | <i>mKate2-L2-Po2A-Gfp-NLS</i>     | co-expresses mKate2 fused to a HA tag and Gfp fused to an NLS partial separated during translation by Po2A fused to L2 linker                          | 3145 | NatR | This study |
| <b>AB33<sup>rrm4Δ/Rrm4-Gfp-L2-P2A-Firefly-HA</sup></b>                    | <i>rrm4-Gfp-L2-P2A-firefly-HA</i> | co-expresses Rrm4 fused C-terminally to Gfp and Firefly luciferase fused to HA tag; separation during translation through P2A N-terminally fused to L2 | 3212 | CbxR | This study |

**Supplementary Table S2: *U. maydis* strains generated in this study;**  
 UMa and pUMa, internal reference number

| Strain                                                                                                     | UMa  | Relevant genotype                                                   | Transformed plasmid                                                                                         | Locus                 | Progenitor strain   |
|------------------------------------------------------------------------------------------------------------|------|---------------------------------------------------------------------|-------------------------------------------------------------------------------------------------------------|-----------------------|---------------------|
| AB33Rrm4-mKate2                                                                                            | 1985 | <i>Rrm4-mKate2</i>                                                  | $P_{rrm4}$ - <i>rrm4</i> -mKate2 (pUMa2985)                                                                 | <i>rrm4</i>           | AB33rrm4Δ           |
| AB33upp3Δ                                                                                                  | 2148 | <i>upp3</i> Δ                                                       | <i>pupp3</i> Δ-hygR (pUMa1556)                                                                              | <i>upp3</i>           | AB33                |
| AB33upp3Δ::P <sub>otef</sub> -mKate2-HA-F2A-Gfp-NLS                                                        | 2495 | <i>mKate2-F2A-Gfp-NLS</i>                                           | <i>pupp3</i> Δ::P <sub>otef</sub> -mKate2-HA-F2A-Gfp-NLS (pUMa3407)                                         | <i>upp3</i>           | AB33upp3Δ           |
| AB33upp3Δ::P <sub>otef</sub> -mKate2-HA-F2AΔP-Gfp-NLS                                                      | 2520 | <i>mKate2-F2AΔP-Gfp-NLS</i>                                         | <i>pupp3</i> Δ::P <sub>otef</sub> -mKate2-HA-F2AΔP-Gfp-NLS (pUMa3435)                                       | <i>upp3</i>           | AB33upp3Δ           |
| MB215 <i>rua1</i> Δ/P <sub>oma</sub> - <i>emt1</i> -HA-L2-P2A-Gfp- <i>mac1</i> -L2-P2A- <i>mac2</i> -3xmyc | 3084 | <i>emt1</i> -HA-L2-P2A- <i>gfp-mac1</i> -L2-P2A- <i>mac2</i> -3xmyc | $pip^R$ ::P <sub>oma</sub> - <i>emt1</i> -HA-L2-P2A-Gfp- <i>mac1</i> -L2-P2A- <i>mac2</i> -3xmyc (pUMa4131) | <i>ip<sup>S</sup></i> | MB215 <i>rua1</i> Δ |
| AB33upp3Δ::P <sub>otef</sub> -mKate2-HA-L1-F2A-Gfp-NLS                                                     | 3116 | <i>mKate2-L1-F2A-Gfp-NLS</i>                                        | <i>pupp3</i> Δ::P <sub>otef</sub> -mKate2-HA-L1-F2A-Gfp-NLS (pUMa4261)                                      | <i>upp3</i>           | AB33upp3Δ           |
| AB33upp3Δ::P <sub>otef</sub> -mKate2-HA-L2-F2AΔp-Gfp-NLS                                                   | 3119 | <i>mKate2-L2-F2AΔp-Gfp-NLS</i>                                      | <i>pupp3</i> Δ::P <sub>otef</sub> -mKate2-HA-L2-F2AΔp-Gfp-NLS (pUMa4197)                                    | <i>upp3</i>           | AB33upp3Δ           |
| AB33upp3Δ::P <sub>otef</sub> -mKate2-HA-L2-T2A-Gfp-NLS                                                     | 3120 | <i>mKate2-L2-T2A-Gfp-NLS</i>                                        | <i>pupp3</i> Δ::P <sub>otef</sub> -mKate2-HA-L2-T2A-Gfp-NLS (pUMa4202)                                      | <i>upp3</i>           | AB33upp3Δ           |
| AB33upp3Δ::P <sub>otef</sub> -mKate2-HA-L1-F2AΔp-Gfp-NLS                                                   | 3122 | <i>mKate2-L1-F2AΔp-Gfp-NLS</i>                                      | <i>pupp3</i> Δ::P <sub>otef</sub> -mKate2-HA-L1-F2AΔp-Gfp-NLS (pUMa4273)                                    | <i>upp3</i>           | AB33upp3Δ           |
| AB33upp3Δ::P <sub>otef</sub> -mKate2-HA-L2-P2A-Gfp-NLS                                                     | 3123 | <i>mKate2-L2-P2A-Gfp-NLS</i>                                        | <i>pupp3</i> Δ::P <sub>otef</sub> -mKate2-HA-L2-P2A-Gfp-NLS (pUMa4199)                                      | <i>upp3</i>           | AB33upp3Δ           |
| AB33upp3Δ::P <sub>otef</sub> -mKate2-HA-L2-F2A-eGFP-NLS                                                    | 3144 | <i>mKate2-L2-F2A-Gfp-NLS</i>                                        | <i>pupp3</i> Δ::P <sub>otef</sub> -mKate2-HA-L2-F2A-Gfp-NLS (pUMa4198)                                      | <i>upp3</i>           | AB33upp3Δ           |
| AB33upp3Δ::P <sub>otef</sub> -mKate2-HA-L2-Po2A-eGFP-NLS                                                   | 3145 | <i>mKate2-L2-Po2A-Gfp-NLS</i>                                       | <i>pupp3</i> Δ::P <sub>otef</sub> -mKate2-HA-L2-Po2A-Gfp-NLS (pUMa4204)                                     | <i>upp3</i>           | AB33upp3Δ           |
| AB33rrm4Δ/Rrm4-Gfp-L2-P2A-Firefly-HA                                                                       | 3212 | <i>rrm4</i> -Gfp-L2-P2A- <i>firefly</i> -HA                         | $pip^R$ ::P <sub>erg</sub> - <i>rrm4</i> -Gfp-L2-P2A- <i>firefly</i> -HA (pUMa4565)                         | <i>ip<sup>S</sup></i> | AB33rrm4Δ           |

Appendix Table S3: Plasmids generated in this study; pUMa, internal reference number

| Plasmid                                                                                                       | pUMa | Resistance cassette                                                                                                                          | Short description                                                                                                                                                                                                                                                                                                                                                                                                                                                                                                                                                                                                                                                                                                                                                                                                                                                                                                                                                                                                                                                                                                                                                                                                       |
|---------------------------------------------------------------------------------------------------------------|------|----------------------------------------------------------------------------------------------------------------------------------------------|-------------------------------------------------------------------------------------------------------------------------------------------------------------------------------------------------------------------------------------------------------------------------------------------------------------------------------------------------------------------------------------------------------------------------------------------------------------------------------------------------------------------------------------------------------------------------------------------------------------------------------------------------------------------------------------------------------------------------------------------------------------------------------------------------------------------------------------------------------------------------------------------------------------------------------------------------------------------------------------------------------------------------------------------------------------------------------------------------------------------------------------------------------------------------------------------------------------------------|
| <b>P<sub>rrm4</sub>-<i>rrm4</i>-mKate2</b>                                                                    | 2985 | NatR (SfiI-insert of pMF5-1n)                                                                                                                | Vector for the expression of Rrm4 C-terminally fused to mKate2. The mKate2 cassette contains the Tnos terminator and the Nat resistance. The entire coding sequence for the fusion protein is flanked by an 830 bp upstream region and a 1.9 kb downstream region for homologous recombination. The plasmid is a derivative of pRrm4G-NatR (Becht et al., 2006), with Gfp was exchanged to mKate2.                                                                                                                                                                                                                                                                                                                                                                                                                                                                                                                                                                                                                                                                                                                                                                                                                      |
| <b><i>pupp3Δ</i>::P<sub>otef</sub>-mKate2-HA-F2A-Gfp-NLS</b>                                                  | 3407 | NatR                                                                                                                                         | Vector contains a fusion of mKate2-HA and Gfp-NLS. mKate2 with F2A in reverse overhang was amplified with ofw: ATGGTGTCTGGAGCTCATC and orev: TTTGAGGAGATCGAAGTTGAGCAGCTGTTTCACGGGG GCGTAGTCTGGGCACGTCGTAAGGGTAGAGCGGACCCTGCATATGGC GGTGACCG. Gfp with F2A in forward overhang was amplified with ofw: TGAAACAGCTGCTCAAACCTTCGATCTCCTCAAACCTGGCCGG CGACGTGGAATCAAATCCTGGACCTATGGTGAGCAAGGGC and orev: CTTGTACAGCTCGTCCATG. In between a F2A peptide ensures expression of two proteins from one open reading frame Expression is driven by the constitutive P <sub>otef</sub> and terminated by T <sub>nos</sub> . Flanking regions of 800 bp upstream and 700 bp downstream of the entire construct ensure homologous recombination at <i>upp3</i> locus. Plasmid was generated using AQUA cloning.                                                                                                                                                                                                                                                                                                                                                                                                                     |
| <b><i>pupp3Δ</i>::P<sub>otef</sub>-mKate2-HA-F2AΔP-Gfp-NLS</b>                                                | 3435 | NatR                                                                                                                                         | Same as pUMa3407. mKate2 with F2A in reverse overhang was amplified with ofw: ATGGTGTCTGGAGCTCATC and orev:TTTGAGGAGATCG AAGTTGAGCAGCTGTTTCACGGGGCGTAGTCGGGCACGTCGTAAG GGTAGAGCGGACCCTGCATATGGCGGTGACCG. Gfp with F2A in forward overhang was amplified with ofw:TGAAACAGCTGCTCA ACTTCGATCTCCTCAAACCTGGCCGGCGACGTGGAATCAAATCCTGGA ATGGTGAGCAAGGGC and orev: CTTGTACAGCTCGTCCATG. In between a F2A is inserted in which the last proline is deleted. Plasmid was generated using AQUA cloning.                                                                                                                                                                                                                                                                                                                                                                                                                                                                                                                                                                                                                                                                                                                           |
| <b><i>pip</i><sup>R</sup>::P<sub>oma</sub>-<i>emt1</i>-HA-L2-P2A-Gfp-<i>mac1</i>-L2-P2A-<i>mac2</i>-3xmyc</b> | 4131 | CbxR (integration of <i>ip</i> <sup>R</sup> gene into <i>ip</i> <sup>S</sup> locus; ip: Iron-sulfur subunit of the suc-cinate dehydrogenase) | Vector for the expression of Emt1, Mac1 and Mac2 with respective tags, linked by the L2 linker and P2A in a single open reading frame. Emt1-HA with L2-P2A in reverse overhang was amplified with ofw:TACCTTACT CTATCAGGATCCCCGCATGAAGGTTGCC TCCTTGC and orev: GCTCCTCGCCCTTGCTCACCATGGGACCGGGTTCTCCTCGACGTCA CCG. <i>gfp-mac1</i> with P2A in forward overhang and L2 in reverse overhang was amplified with ofw:CGGTGACGTCGAGGAGACC CCGGTCCCATGGTGAGCAAGGGCGAGGAGC and orev:GCGGG AAGCCGTGGCTAAGCTTAAACACAGGAGCGGTTCGCATCGACCG. Mac2 with L2-P2A in forward overhang and 3xmyc and Tnos in reverse overhang was amplified with ofw:ATGCGACCGCTCCTGTG TTTAAG CTTAGCCACGGCTTCCCGC and orev: GCAAAAGCGAAACAGCGG CGCGACCCTAGAGTCTCTTCCGAGATGAGCT TCTGCT CGGA CCACCGGCCGAGAGGTCCTCTTCCGAGATGAGCTTCTGCTCCGAGCC GGCACCGCGAGGTCCTCTTCCGAGATGAGCTTCTGCTCCTCGGGA GCGTCAACGGGGACTG. The P2A peptide ensures translation of three proteins from a single open reading frame. Expression is driven by the synthetic constitutive promoter P <sub>oma</sub> and terminated by T <sub>nos</sub> . The expression cassette contains the <i>ipR</i> gene, which is cleaved to ensure homologous recombination prior to transformation. |

Polycistronic expression in *U. maydis*

|                                                                                             |      |      |                                                                                                                                                                                                                                                                                                                                                                                                                                                                                                                                                                                                                                                                                                                                                                                                                                              |
|---------------------------------------------------------------------------------------------|------|------|----------------------------------------------------------------------------------------------------------------------------------------------------------------------------------------------------------------------------------------------------------------------------------------------------------------------------------------------------------------------------------------------------------------------------------------------------------------------------------------------------------------------------------------------------------------------------------------------------------------------------------------------------------------------------------------------------------------------------------------------------------------------------------------------------------------------------------------------|
| <b>pupp3Δ::<br/>P<sub>otef</sub>-<br/>mKate2-<br/>HA-L1-<br/>F2A-<br/>Gfp-NLS</b>           | 4261 | NatR | Vector contains a fusion of mKate2-HA and Gfp-NLS. mKate2 was amplified with ofw:GGTCTCGCCTGCCCTGCAGGCTAGAACT AGTG and orev:GGTCTCCAGGCCGGCCGGCGTAGTCGGGCA CGTCGTAAGG. Gfp was amplified with ofw:GGTCTCCGCTGC GAGAGAGAGAGCTCAGCCCATGGTGAGCAAGGGCGAGG and orev: GGTCTCGCTGCGGGCGCCGGCCGCTAGATC. In between a F2A peptide N-terminally fused to an GSG linker (L1) ensures expression of two proteins from one open reading frame. GSG-F2A was amplified with ofw:GGCCGGCCTGGCTCGGGCCCCGTGAAACAGCTGCT CAAC and orev:GGCCGGCCTCACGGCTTCCC GCCGGCGGTGG CGGGCAGGATGATGGCACGCTGGTCGCCATGACCGTCATGGCCTTC . Expression is driven by the constitutive P <sub>otef</sub> and terminated by T <sub>nos</sub> . Flanking regions of 800 bp upstream and 700 bp downstream of the entire construct ensure homologous recombination at <i>upp3</i> locus. |
| <b>pupp3Δ::<br/>P<sub>otef</sub>-<br/>mKate2-<br/>HA-L2-<br/>F2AΔP-<br/>Gfp-NLS</b>         | 4197 | NatR | Same as pUMa3261. Within F2A the last proline is deleted and it is N-terminally fused to KLSHGFPVAVAQDDGTLV (L2). F2AΔP was amplified with ofw:GGCCGGCCTCACGGCTTCCC GCCGGCGGTGG CGGGCAGGATGATGGCACGCTGGTCCCCGTGAAACAGCTGCTCAA C and orev: GCTGAGCTCCAGGATTTGATTCCACG.                                                                                                                                                                                                                                                                                                                                                                                                                                                                                                                                                                        |
| <b>pupp3Δ::<br/>P<sub>otef</sub>-<br/>mKate2-<br/>HA-L2-<br/>T2A-<br/>Gfp-NLS</b>           | 4202 | NatR | Same as pUMa4197. T2A was amplified with ofw:GGCCGGCCTCACGG CTTCCC GCCGGCGGTGGCGGCGCAGGATGATGGCACGCTGGTCCGT GGTCTCTGTCGCCAGAAC and orev:GCTGAGCGGGACCGGGGT TCTCTCGAC.                                                                                                                                                                                                                                                                                                                                                                                                                                                                                                                                                                                                                                                                        |
| <b>pupp3Δ::<br/>P<sub>otef</sub>-<br/>mKate2-<br/>HA-L1-<br/>F2AΔP-<br/>Gfp-NLS</b>         | 4273 | NatR | Same as pUMa4261. F2AΔP was amplified with ofw:GGCCGGCCTGGC TCGGGCCGCCACAAGTCCCCACCAAC and orev:GCTGAGCGGG ACCGGGGTTTCGACTCGAC.                                                                                                                                                                                                                                                                                                                                                                                                                                                                                                                                                                                                                                                                                                              |
| <b>pupp3Δ::<br/>P<sub>otef</sub>-<br/>mKate2-<br/>HA-L2-<br/>P2A-<br/>Gfp-NLS</b>           | 4199 | NatR | Same as pUMa4197. P2A was amplified with ofw:GGCCGGCCTCACGG CTTCCC GCCGGCGGTGGCGGCGCAGGATGATGGCACGCTGGTCCCC GTGAAACAGCTGCTCAAC and orev:GCTGAGCAGGTCCAGGA TTTGATTCC.                                                                                                                                                                                                                                                                                                                                                                                                                                                                                                                                                                                                                                                                         |
| <b>pupp3Δ::<br/>P<sub>otef</sub>-<br/>mKate2-<br/>HA-L2-<br/>F2A-<br/>Gfp-NLS</b>           | 4198 | NatR | Same as pUMa4197. F2A N-terminally fused to L2 was codon optimized ordered from IDT (Integrated DNA Technologies Inc. Coralville).                                                                                                                                                                                                                                                                                                                                                                                                                                                                                                                                                                                                                                                                                                           |
| <b>pupp3Δ::<br/>P<sub>otef</sub>-<br/>mKate2-<br/>HA-L2-<br/>Po2A-<br/>Gfp-NLS</b>          | 4204 | NatR | Same as pUMa4197. Po2A N-terminally fused to L2 was codon optimized ordered from IDT (Integrated DNA Technologies Inc. Coralville).                                                                                                                                                                                                                                                                                                                                                                                                                                                                                                                                                                                                                                                                                                          |
| <b>pip<sup>R</sup>::P<sub>crg</sub>-<br/>rrm4-<br/>Gfp-L2-<br/>P2A-<br/>firefly-<br/>HA</b> | 4565 | CbxR | Vector for the co-expression of Rrm4 C-terminally fused to Gfp and Firefly luciferase fused to HA tag separated during translation with L2-P2A. L2-P2A was amplified with ofw:TGTACAAACACGGCTT CCCGCCGGCGGTG and orev:CAATTGGGGACCGGGGTTCTCTCT CGAC. Firefly was amplified with ofw:CGGGATCCCCGGGCTG CAGGAATTCGATCCCCAATTGATGGAGGACGCCAAGAA and orev:GCCGGGCGCCGGCGCCGGCCGCTAGATCTTTAGGCGTAGT CGGGCACGTCGTAAGGGTAGAGCGGACCCTGGACGGCGATCTTGCC.                                                                                                                                                                                                                                                                                                                                                                                                |
